# Supplementary material
Source: publisher figshare collection journal article supplement (https://gsajournals.figshare.com/ndownloader/files/20130821)
Supplement: Supplementary file 1 [file 20130821]

## Sheet: N2(+5_HT)
Wormbase Gene	baseMean	log2FoldChange	lfcSE	stat	pvalue	padj	wormbase_gene	external_gene_name	chromosome_name	start_position	end_position	strand
WBGene00000031	164.923	-3.55792	0.853975	-4.1663	3.09578e-05	0.00802893	WBGene00000031	abu-8	V	5163269	5194608	-1
WBGene00000033	54.42	-3.37355	0.650938	-5.1826	2.18813e-07	0.000185792	WBGene00000033	abu-10	X	3798179	3799741	1
WBGene00000616	428.211	-1.2128	0.256312	-4.73175	2.22595e-06	0.00118785	WBGene00000616	col-39	II	10704902	10706019	1
WBGene00000641	322.993	-3.25864	0.565605	-5.76133	8.34528e-09	1.36457e-05	WBGene00000641	col-65	I	11489158	11490630	-1
WBGene00000681	768.974	-2.08041	0.446925	-4.65495	3.24062e-06	0.00150177	WBGene00000681	col-107	IV	1548721	1549714	1
WBGene00000717	1831.6	-1.05888	0.258033	-4.10366	4.06663e-05	0.00942281	WBGene00000717	col-144	V	9159642	9160642	-1
WBGene00000738	1010.35	-4.42984	1.08315	-4.08978	4.31777e-05	0.00979501	WBGene00000738	col-165	X	4353618	4354820	1
WBGene00000853	86.2413	-2.93593	0.706956	-4.15291	3.2827e-05	0.00802893	WBGene00000853	cut-6	III	10911460	10916567	1
WBGene00000928	240.22	-2.36763	0.439874	-5.38253	7.34453e-08	8.08357e-05	WBGene00000928	dao-2	II	4562853	4563546	1
WBGene00001059	459.234	0.948808	0.230073	4.12394	3.72451e-05	0.00894833	WBGene00001059	dpf-6	III	8038241	8041374	1
WBGene00001065	79.501	-4.33252	0.745289	-5.81321	6.12848e-09	1.19914e-05	WBGene00001065	dpy-3	X	2144605	2145647	-1
WBGene00001069	110.654	-3.4851	0.551942	-6.31424	2.71498e-10	9.56216e-07	WBGene00001069	dpy-7	X	7536417	7537792	-1
WBGene00001075	1271.44	-3.8489	0.859482	-4.47816	7.52892e-06	0.00265168	WBGene00001075	dpy-14	I	6843589	6845134	1
WBGene00001182	990.86	0.663934	0.153229	4.33295	1.47123e-05	0.00471061	WBGene00001182	egl-13	X	5663837	5674060	1
WBGene00001468	286.93	-1.18332	0.259357	-4.56252	5.05439e-06	0.00197795	WBGene00001468	flr-4	X	15089397	15093585	1
WBGene00001702	249.079	-1.02076	0.243653	-4.18939	2.79705e-05	0.00774299	WBGene00001702	grd-13	IV	3438312	3439503	1
WBGene00001828	84.7315	-3.1766	0.654118	-4.85631	1.19595e-06	0.000679377	WBGene00001828	hch-1	X	14696412	14699977	-1
WBGene00001858	299.443	-3.62902	0.656324	-5.52931	3.21495e-08	3.98291e-05	WBGene00001858	hil-7	IV	6646034	6646936	1
WBGene00002051	147.838	-2.64781	0.446674	-5.92784	3.0695e-09	6.75674e-06	WBGene00002051	ifa-3	X	16267257	16270056	-1
WBGene00004155	138.35	-5.35092	0.886114	-6.03864	1.55416e-09	3.90982e-06	WBGene00004155	pqn-73	II	8540720	8545452	1
WBGene00004219	124.5	-2.89949	0.698048	-4.15371	3.2713e-05	0.00802893	WBGene00004219	ptr-4	X	6060754	6065986	-1
WBGene00006366	266.637	-2.01461	0.435175	-4.62942	3.6669e-06	0.00161435	WBGene00006366	sym-1	X	14581654	14584374	1
WBGene00006584	1270.21	-0.829288	0.198015	-4.18802	2.81403e-05	0.00774299	WBGene00006584	tni-1	X	11375887	11377470	-1
WBGene00006651	465.579	-3.60753	0.626551	-5.75776	8.52373e-09	1.36457e-05	WBGene00006651	tts-2	II	10201125	10202230	-1
WBGene00006844	424.399	-0.865696	0.173765	-4.98198	6.29357e-07	0.00046179	WBGene00006844	unc-120	I	8460225	8463015	1
WBGene00006947	254.508	-3.63665	0.713139	-5.09949	3.40565e-07	0.000272607	WBGene00006947	wrt-1	II	7531145	7533246	1
WBGene00007525	122.751	-2.74994	0.637768	-4.31181	1.61923e-05	0.00500256	WBGene00007525	C11G10.1	X	15157359	15158749	-1
WBGene00007806	19.3494	-7.78505	1.87435	-4.15347	3.27473e-05	0.00802893	WBGene00007806	clec-230	V	15347847	15349144	-1
WBGene00008239	1887.54	-0.524644	0.118406	-4.43088	9.38472e-06	0.00324049	WBGene00008239	fshr-1	V	9889839	9894849	1
WBGene00008851	113.626	-3.82311	0.67618	-5.65398	1.56773e-08	2.12367e-05	WBGene00008851	F15B9.8	V	12988543	12992185	1
WBGene00008944	2660.75	0.62671	0.134905	4.64558	3.39124e-06	0.00153128	WBGene00008944	F19B2.5	V	20162649	20164561	-1
WBGene00009041	1122.32	-4.53313	1.09981	-4.12174	3.76023e-05	0.00894833	WBGene00009041	cut-3	II	8445168	8446831	-1
WBGene00009304	273.562	-1.33552	0.315436	-4.23387	2.29702e-05	0.00663124	WBGene00009304	eva-1	I	14829667	14834839	-1
WBGene00009653	179.713	-2.23881	0.485087	-4.61528	3.92565e-06	0.00164597	WBGene00009653	F43D9.1	III	10488128	10500267	1
WBGene00009691	206.041	2.03919	0.229967	8.86733	7.49235e-19	6.59702e-15	WBGene00009691	F44E5.4	II	11757106	11759323	-1
WBGene00009692	209.915	2.02559	0.227883	8.88871	6.18218e-19	6.59702e-15	WBGene00009692	F44E5.5	II	11759640	11761853	1
WBGene00009926	762.614	-1.54694	0.344723	-4.48749	7.2066e-06	0.00258997	WBGene00009926	noah-2	IV	14091254	14096617	1
WBGene00010007	3314.88	-0.451163	0.103287	-4.36806	1.25353e-05	0.00416502	WBGene00010007	F53H4.2	X	15857153	15857974	1
WBGene00010468	130.324	-3.27911	0.710421	-4.61574	3.91705e-06	0.00164597	WBGene00010468	K01D12.9	V	12403942	12404651	-1
WBGene00010740	101.136	10.0541	1.22015	8.24011	1.72046e-16	1.00991e-12	WBGene00010740	K10D3.6	I	7116092	7116889	-1
WBGene00010893	29.1031	-5.12811	1.16704	-4.39412	1.11224e-05	0.00376664	WBGene00010893	cutl-9	II	10622265	10625943	1
WBGene00011175	143.268	-4.90305	0.808567	-6.06387	1.32881e-09	3.90005e-06	WBGene00011175	R09E10.5	IV	10296046	10302310	-1
WBGene00011369	13.8897	-7.30527	1.48399	-4.92271	8.53519e-07	0.000578095	WBGene00011369	T02C12.4	III	4041224	4042811	-1
WBGene00012032	69.8364	-3.37801	0.744458	-4.53753	5.69157e-06	0.00217888	WBGene00012032	T26C5.2	II	9233223	9236202	1
WBGene00012107	273.077	-0.857171	0.176001	-4.87026	1.11454e-06	0.000654234	WBGene00012107	T27F6.8	I	12497438	12499817	-1
WBGene00012186	346.999	-2.36764	0.55071	-4.29926	1.71372e-05	0.00511502	WBGene00012186	mlt-11	V	20667209	20678513	1
WBGene00012216	965.167	0.659819	0.146835	4.49361	7.00263e-06	0.00256909	WBGene00012216	W02D9.10	I	12551537	12552375	1
WBGene00012261	312.386	-3.55739	0.686717	-5.18028	2.21558e-07	0.000185792	WBGene00012261	lpr-3	X	11057401	11059794	1
WBGene00012814	104.098	-2.83443	0.581628	-4.87328	1.09762e-06	0.000654234	WBGene00012814	Y43F8B.3	V	19503108	19519950	1
WBGene00013846	14.9059	-7.40897	1.81207	-4.08867	4.3385e-05	0.00979501	WBGene00013846	ZC84.1	III	9199450	9206285	-1
WBGene00015163	1282.77	-0.950006	0.194726	-4.87869	1.06795e-06	0.000654234	WBGene00015163	B0361.9	III	7298348	7299643	-1
WBGene00015340	311.767	-3.746	0.586641	-6.38551	1.70828e-10	7.5207e-07	WBGene00015340	C02E7.7	V	4918154	4918585	-1
WBGene00015439	142.796	1.33538	0.241923	5.51987	3.39259e-08	3.98291e-05	WBGene00015439	C04E12.10	V	3377536	3382850	-1
WBGene00015546	43.3437	-4.43199	0.939797	-4.7159	2.40647e-06	0.00124641	WBGene00015546	C06G1.2	X	16621807	16622739	1
WBGene00015781	93.9153	-3.21678	0.601608	-5.34697	8.94395e-08	9.26488e-05	WBGene00015781	C14F11.6	X	6238021	6239115	-1
WBGene00015993	73.5432	-3.70655	0.75171	-4.93083	8.18803e-07	0.000576765	WBGene00015993	C18H7.1	IV	615544	620925	1
WBGene00016101	544.625	-0.72224	0.166447	-4.33916	1.43026e-05	0.00466423	WBGene00016101	C25E10.12	V	9060494	9062441	-1
WBGene00016146	144.478	-2.15558	0.515553	-4.18111	2.90086e-05	0.0078591	WBGene00016146	C26F1.1	V	7785417	7787712	1
WBGene00016700	101.9	-3.70694	0.824884	-4.49389	6.99354e-06	0.00256909	WBGene00016700	C46A5.4	IV	7748157	7757358	-1
WBGene00017073	83.1481	-2.91193	0.697115	-4.17711	2.95231e-05	0.0078773	WBGene00017073	D2096.6	IV	8368344	8369235	-1
WBGene00017307	70.4404	-5.79695	1.01432	-5.7151	1.09638e-08	1.60893e-05	WBGene00017307	F09F9.2	X	4110442	4111474	-1
WBGene00017687	2406.48	-0.889148	0.190974	-4.65587	3.22618e-06	0.00150177	WBGene00017687	ets-4	X	6518883	6522656	1
WBGene00017937	300.439	-3.57026	0.686272	-5.2024	1.96731e-07	0.000185792	WBGene00017937	F30H5.3	III	505241	512217	-1
WBGene00018969	182.665	-2.84404	0.673413	-4.22332	2.40731e-05	0.00683755	WBGene00018969	F56D3.1	II	4142816	4149678	1
WBGene00019154	289.692	-3.91033	0.754596	-5.18201	2.19503e-07	0.000185792	WBGene00019154	glf-1	IV	5885835	5889821	1
WBGene00019839	204.835	-3.65869	0.77777	-4.70407	2.55024e-06	0.00128314	WBGene00019839	R02F11.1	V	4801094	4802626	1
WBGene00020194	98.0995	-4.51603	1.04906	-4.30485	1.67096e-05	0.00507338	WBGene00020194	T03G6.1	X	2608228	2609989	1
WBGene00020626	223.273	-3.02261	0.727029	-4.15749	3.21765e-05	0.00802893	WBGene00020626	T20F5.4	I	3912635	3915458	-1
WBGene00020853	14.7423	-7.39114	1.51216	-4.88782	1.01961e-06	0.000654234	WBGene00020853	fbxa-137	V	2278826	2281387	1
WBGene00021156	135.123	1.618	0.32277	5.01286	5.36256e-07	0.000410586	WBGene00021156	Y4C6B.2	IV	5340890	5344204	1
WBGene00021513	29.5653	-4.87421	1.06047	-4.59626	4.30145e-06	0.00176159	WBGene00021513	Y41D4B.6	IV	1633772	1637367	1
WBGene00022033	200.301	-2.17567	0.503876	-4.31786	1.57549e-05	0.00495435	WBGene00022033	Y65B4BL.1	I	530969	533084	1
WBGene00022382	4337.44	0.705082	0.147035	4.79532	1.62412e-06	0.000893771	WBGene00022382	Y94H6A.10	IV	2709942	2711374	-1
WBGene00022415	41.5828	-2.78132	0.676659	-4.11038	3.95014e-05	0.00927494	WBGene00022415	Y102A11A.5	X	2030959	2031588	-1
WBGene00022441	106.17	-2.66687	0.570847	-4.67177	2.98612e-06	0.00146071	WBGene00022441	Y110A2AL.4	II	2839304	2840386	1
WBGene00022517	228.932	-3.15347	0.690753	-4.56526	4.98871e-06	0.00197795	WBGene00022517	ZC123.1	I	837996	841746	1
WBGene00022591	43.2564	-2.4323	0.569031	-4.27447	1.91595e-05	0.00562331	WBGene00022591	cuti-1	I	6404587	6405705	1
WBGene00077691	89.8458	-2.82141	0.679091	-4.15469	3.25726e-05	0.00802893	WBGene00077691	T06E4.14	V	9625422	9626269	1

## Sheet: tph-1(mg280) II
Wormbase Gene	baseMean	log2FoldChange	lfcSE	stat	pvalue	padj	external_gene_name	chromosome_name	start_position	end_position	strand
WBGene00012733	82.7798	9.72573	1.25709	7.73669	1.02037e-14	2.5339e-12	Y40B1A.2	I	13347068	13349259	1
WBGene00010740	76.5239	9.61273	1.24788	7.70328	1.32622e-14	3.142e-12	K10D3.6	I	7116092	7116889	-1
WBGene00019040	24.9517	7.99758	1.36241	5.87018	4.35332e-09	4.45651e-07	fbxb-19	II	1688235	1689172	-1
WBGene00016948	20.4013	7.7104	1.42799	5.39949	6.68301e-08	5.80267e-06	scrt-1	I	2568872	2570746	1
WBGene00010100	12.9824	7.06006	1.59638	4.42255	9.75441e-06	0.000482887	F55C9.3	V	19287009	19288173	-1
WBGene00012500	8.97113	6.52107	1.77366	3.67663	0.000236336	0.00793566	hpo-2	I	13066924	13069038	1
WBGene00016547	73.1803	5.61013	0.936622	5.98975	2.10165e-09	2.33239e-07	C40A11.4	II	2137422	2138951	1
WBGene00009859	14.5981	4.78721	1.26685	3.77884	0.00015756	0.00570519	clec-33	V	16867678	16869845	-1
WBGene00044202	16.6005	4.56665	1.22112	3.73972	0.000184224	0.00643469	K10G4.10	V	17273524	17275059	1
WBGene00008612	43.523	4.43493	0.740496	5.98913	2.10961e-09	2.33239e-07	fbxa-103	I	14287872	14295898	-1
WBGene00002085	35.2368	3.99617	0.92374	4.32607	1.51792e-05	0.000721295	ins-2	II	5988526	5989394	1
WBGene00003545	51.9178	3.96775	0.87286	4.54569	5.47554e-06	0.000291046	nas-27	II	1175976	1179323	-1
WBGene00017116	33.3278	3.85406	0.97218	3.96435	7.35966e-05	0.00292692	fbxb-78	IV	4737558	4738734	1
WBGene00044798	71.9604	3.85198	0.542284	7.10325	1.2186e-12	2.2707e-10	tbx-43	III	1765458	1770091	-1
WBGene00017755	772.881	3.78641	0.360269	10.51	7.77205e-26	5.85872e-23	zip-8	III	6478961	6481226	1
WBGene00020204	45.4471	3.7619	0.770601	4.88177	1.05136e-06	6.78949e-05	T04B8.2	II	630075	631980	1
WBGene00016080	49.2689	3.63063	0.67408	5.38605	7.20241e-08	6.18885e-06	C24H12.11	II	427603	429152	-1
WBGene00009156	437.92	3.60535	0.211584	17.0397	4.16527e-65	2.30256e-61	clec-196	IV	17276956	17277748	1
WBGene00050903	42.2502	3.579	0.776658	4.6082	4.06162e-06	0.000225277	Y17D7C.4	V	18713728	18714612	1
WBGene00018458	34.2822	3.53669	0.9777	3.61736	0.000297624	0.00967802	fbxb-30	II	1000437	1001449	-1
WBGene00019704	79.2748	3.50133	0.890013	3.93402	8.35364e-05	0.00324709	fbxb-40	II	1048863	1049949	-1
WBGene00196573	108.126	3.36135	0.380949	8.82363	1.1081e-18	4.836e-16	M163.16	X	14490327	14490548	-1
WBGene00019039	46.4986	3.35147	0.922656	3.63242	0.000280776	0.00920236	fbxb-18	II	1686834	1687795	-1
WBGene00015613	426.518	3.34153	0.390665	8.55343	1.19483e-17	4.60815e-15	C08F1.10	II	1785270	1786309	-1
WBGene00022349	703.456	3.27183	0.281121	11.6385	2.62567e-31	2.90294e-28	Y82E9BR.17	III	1447495	1455770	-1
WBGene00018766	76.849	3.25725	0.525585	6.19737	5.74155e-10	7.15924e-08	F53G2.1	II	2488754	2496641	1
WBGene00020205	772.13	3.22408	0.331805	9.71681	2.55662e-22	1.57033e-19	arrd-1	II	627506	628662	1
WBGene00017211	66.8756	3.18309	0.583893	5.4515	4.99481e-08	4.45343e-06	fbxb-36	II	2059869	2064018	-1
WBGene00021557	182.815	3.16932	0.485749	6.52461	6.81767e-11	1.02786e-08	Y45G5AM.5	V	4160383	4160889	1
WBGene00019921	56.5794	3.14138	0.626428	5.01476	5.31002e-07	3.71567e-05	fbxc-34	II	931171	932327	1
WBGene00000457	130.036	3.1266	0.449913	6.94933	3.67026e-12	6.40712e-10	ceh-36	X	14183449	14185597	-1
WBGene00044417	50.5829	3.12205	0.616396	5.065	4.08392e-07	2.9968e-05	C08F1.11	II	1783451	1784481	-1
WBGene00044066	113.673	3.10052	0.482763	6.42244	1.34105e-10	1.86891e-08	fbxb-66	I	13423994	13425148	-1
WBGene00013155	34.8358	3.08062	0.676269	4.55532	5.23049e-06	0.000279814	Y53F4B.8	II	14994197	14997444	1
WBGene00007351	64.4558	3.05423	0.490254	6.22989	4.66749e-10	5.90883e-08	C05G5.5	X	14756075	14760963	-1
WBGene00006775	104.182	3.03585	0.40372	7.5197	5.49018e-14	1.15252e-11	unc-39	V	14373389	14375799	1
WBGene00016088	2640.73	3.0278	0.1733	17.4714	2.36561e-68	1.96156e-64	clec-266	X	6617393	6622915	-1
WBGene00003939	112.675	2.97708	0.50488	5.8966	3.71059e-09	3.89471e-07	pax-3	II	10146746	10152445	1
WBGene00001898	9096.33	2.96443	0.202561	14.6348	1.68506e-48	3.99214e-45	his-24	X	14490094	14491115	1
WBGene00019514	65.6588	2.9415	0.602567	4.88162	1.05216e-06	6.78949e-05	K08B4.2	IV	6075301	6076157	-1
WBGene00021525	97.5308	2.93961	0.72242	4.06911	4.71924e-05	0.00198136	Y41D4B.26	IV	1631951	1633257	1
WBGene00012063	37.1861	2.90011	0.559254	5.18568	2.1523e-07	1.6997e-05	fbxb-1	V	19240354	19241624	1
WBGene00018452	114.439	2.87259	0.358771	8.00674	1.17788e-15	3.31084e-13	F45D11.5	II	1001703	1002437	1
WBGene00009089	312.203	2.85782	0.352751	8.10151	5.42815e-16	1.63673e-13	jmjd-3.2	X	14448224	14453562	1
WBGene00019956	206.356	2.8515	0.474233	6.01287	1.82271e-09	2.04242e-07	fbxb-75	IV	4439816	4441177	-1
WBGene00021576	1237.29	2.85126	0.199406	14.2988	2.22625e-46	4.61502e-43	fbxc-51	II	868814	871699	1
WBGene00013100	185.049	2.84288	0.328906	8.64345	5.45419e-18	2.20615e-15	zip-7	IV	16503249	16505682	-1
WBGene00012066	45.7718	2.83491	0.753649	3.76157	0.000168848	0.00604788	fbxb-116	V	19233937	19235585	1
WBGene00016578	74.8576	2.83199	0.460173	6.1542	7.54597e-10	9.20165e-08	sdz-5	II	3008700	3009889	1
WBGene00022816	969.959	2.8269	0.325651	8.68077	3.93092e-18	1.62976e-15	fbn-1	III	7625376	7641053	1
WBGene00017249	74.3922	2.81648	0.58834	4.78717	1.6915e-06	0.000105856	fbxb-108	II	2764964	2767230	1
WBGene00017208	130.566	2.80982	0.422902	6.64415	3.04964e-11	4.77124e-09	fbxb-35	II	2051669	2052745	1
WBGene00015610	363.52	2.80751	0.301689	9.30596	1.32788e-20	6.88174e-18	C08F1.6	II	1787222	1788187	-1
WBGene00019927	128.243	2.77309	0.366712	7.56204	3.96782e-14	8.65821e-12	fbxc-24	II	907535	909631	-1
WBGene00020073	540.839	2.76171	0.288581	9.56996	1.06945e-21	6.33421e-19	sdz-28	II	2131070	2132475	1
WBGene00021204	49.921	2.7531	0.553868	4.97068	6.67184e-07	4.57214e-05	fbxb-77	IV	4754199	4756157	-1
WBGene00019591	111.606	2.74096	0.382647	7.16316	7.88369e-13	1.48572e-10	fbxc-25	II	2294693	2296265	-1
WBGene00086555	65.2776	2.73434	0.450968	6.06327	1.33384e-09	1.56882e-07	F49B2.7	I	14305070	14307134	1
WBGene00016071	90.5106	2.71757	0.585902	4.63828	3.51328e-06	0.000201606	C24H12.1	II	441402	443674	1
WBGene00012238	78.0353	2.68235	0.46885	5.72113	1.05821e-08	1.03231e-06	W04A8.3	I	13844729	13846957	-1
WBGene00020537	175.806	2.67863	0.387521	6.91221	4.7717e-12	8.15813e-10	fbxb-37	II	2092681	2093876	-1
WBGene00009343	70.8706	2.67651	0.592421	4.51792	6.24491e-06	0.000319647	F32H2.6	I	8998532	8999564	-1
WBGene00003377	105.102	2.66765	0.452729	5.89238	3.80667e-09	3.97042e-07	mls-2	X	4758804	4761612	-1
WBGene00018437	369.536	2.65882	0.308553	8.61706	6.86956e-18	2.71249e-15	btb-8	II	1722770	1724186	1
WBGene00019072	20.6051	2.65442	0.706103	3.75926	0.000170416	0.00608735	fbxc-8	IV	909415	913167	1
WBGene00022112	175.025	2.65191	0.301223	8.8038	1.32254e-18	5.62387e-16	Y71F9AL.7	I	2887800	2889434	1
WBGene00019923	162.069	2.64993	0.389862	6.79711	1.06741e-11	1.77019e-09	fbxc-29	II	916051	917464	1
WBGene00007481	113.408	2.62846	0.575089	4.57053	4.86487e-06	0.000265392	C09F9.4	II	14718362	14719670	1
WBGene00014615	32.7445	2.62744	0.573486	4.58152	4.61609e-06	0.000253488	Y116F11A.4	V	19733411	19735075	1
WBGene00000503	4144.48	2.61587	0.17008	15.3803	2.22052e-53	7.36502e-50	cht-1	X	3397613	3400017	-1
WBGene00020362	92.2718	2.60583	0.503531	5.17511	2.27778e-07	1.77346e-05	fbxb-10	II	1817281	1818400	-1
WBGene00007479	906.541	2.58492	0.403988	6.39851	1.569e-10	2.15044e-08	C09F9.2	II	14705512	14712800	1
WBGene00206519	94.1474	2.56113	0.688674	3.71893	0.000200071	0.00686953	F36H5.13	II	1748378	1749943	-1
WBGene00008066	47.8153	2.55738	0.474028	5.395	6.85231e-08	5.91868e-06	fbxb-65	V	19329563	19330747	1
WBGene00077531	46.5912	2.54683	0.541389	4.70424	2.5481e-06	0.000153107	F40G9.15	III	181561	182981	1
WBGene00016886	93.3209	2.53748	0.573089	4.42772	9.52337e-06	0.000472861	fbxb-96	II	1849430	1850403	-1
WBGene00016359	125.965	2.52123	0.417842	6.03394	1.60011e-09	1.84279e-07	fbxb-88	II	4826507	4827884	-1
WBGene00010101	51.8936	2.49167	0.527718	4.72159	2.34005e-06	0.0001432	fbxb-57	V	19288755	19289889	1
WBGene00001820	617.37	2.483	0.198201	12.5277	5.26621e-36	6.71806e-33	ham-1	IV	12542034	12545729	1
WBGene00013508	884.797	2.47613	0.244994	10.1069	5.14841e-24	3.41525e-21	Y71A12B.11	I	13978430	13980144	1
WBGene00011475	684.965	2.47394	0.291676	8.48181	2.21708e-17	7.99307e-15	T05D4.2	III	13561729	13563082	-1
WBGene00013280	72.8937	2.47245	0.646801	3.82258	0.000132065	0.00485624	Y57A10C.1	II	12411622	12412517	-1
WBGene00019791	231.394	2.46346	0.306177	8.04585	8.56456e-16	2.49184e-13	sdz-25	IV	8405022	8406611	-1
WBGene00004335	145.667	2.45433	0.674594	3.63823	0.000274519	0.00905094	ref-2	X	7744239	7750010	1
WBGene00012420	369.126	2.43477	0.352179	6.91345	4.73008e-12	8.15813e-10	Y7A9D.1	IV	16381378	16382235	-1
WBGene00009369	3099.58	2.42422	0.127755	18.9755	2.71837e-80	4.50815e-76	F33H2.6	I	15014851	15016595	-1
WBGene00020542	82.3637	2.42227	0.463173	5.22974	1.69751e-07	1.37997e-05	fbxb-82	III	142121	143217	-1
WBGene00219217	44.878	2.4173	0.613384	3.94093	8.11668e-05	0.00317469	C08F8.15	IV	11159570	11160807	-1
WBGene00009510	28.0563	2.40862	0.604286	3.98589	6.72274e-05	0.00269952	F37D6.4	I	10488648	10489569	1
WBGene00003380	115.567	2.40797	0.403238	5.97158	2.3496e-09	2.58051e-07	mnm-2	X	7422641	7424881	-1
WBGene00013145	125.088	2.40795	0.462027	5.21172	1.87095e-07	1.49893e-05	cutl-2	II	9721828	9724526	-1
WBGene00019788	231.453	2.38785	0.319226	7.48013	7.42466e-14	1.50159e-11	M116.1	IV	8410578	8412167	1
WBGene00016298	60.7398	2.38277	0.424083	5.61865	1.92453e-08	1.80319e-06	fbxc-14	II	974290	975511	1
WBGene00018606	274.346	2.37216	0.315152	7.52705	5.1899e-14	1.10345e-11	F48E3.6	X	7501236	7502674	-1
WBGene00018489	535.905	2.36565	0.376141	6.28925	3.19008e-10	4.19875e-08	F46E10.2	V	6520435	6521099	1
WBGene00019311	266.466	2.36094	0.311653	7.57554	3.57637e-14	7.90808e-12	K02E7.6	II	1057212	1059280	1
WBGene00006956	418.855	2.35205	0.428403	5.49029	4.01276e-08	3.63648e-06	wrt-10	II	7533300	7534563	-1
WBGene00019042	78.4467	2.34322	0.485246	4.82894	1.37265e-06	8.68854e-05	fbxc-21	II	1691557	1692907	-1
WBGene00018436	95.3896	2.3402	0.506638	4.61907	3.85468e-06	0.000218925	fbxb-11	II	1724614	1725692	1
WBGene00019043	109.007	2.33722	0.316431	7.38619	1.51092e-13	3.01893e-11	fbxc-26	II	1693296	1694615	-1
WBGene00006366	1318.49	2.32901	0.362487	6.4251	1.31782e-10	1.86129e-08	sym-1	X	14581654	14584374	1
WBGene00021913	1189.48	2.32875	0.201089	11.5807	5.16372e-31	5.35219e-28	cec-8	III	429300	431750	1
WBGene00010585	209.917	2.32147	0.455973	5.09124	3.55725e-07	2.63363e-05	K05C4.9	I	14726804	14730719	-1
WBGene00021463	198.478	2.31846	0.358439	6.46822	9.91654e-11	1.45536e-08	zeel-1	I	2342216	2350468	1
WBGene00016307	220.664	2.31756	0.414473	5.59157	2.2502e-08	2.09648e-06	fbxc-18	II	965576	967062	-1
WBGene00017911	80.8871	2.30539	0.533523	4.32106	1.55278e-05	0.000731572	fbxb-106	II	2762417	2763477	1
WBGene00001958	108.308	2.29992	0.343837	6.68898	2.24733e-11	3.58363e-09	hlh-14	II	5737790	5738888	-1
WBGene00019703	202.885	2.27186	0.371964	6.10774	1.01049e-09	1.20561e-07	fbxb-41	II	1041321	1042327	-1
WBGene00018236	55.5928	2.26985	0.498203	4.55609	5.21157e-06	0.000279705	fbxb-71	X	3262900	3264161	1
WBGene00077441	35.0796	2.2586	0.529993	4.26157	2.02999e-05	0.00092487	C43D7.10	V	19308707	19309687	-1
WBGene00007213	50.9139	2.24454	0.598794	3.74843	0.000177942	0.0062921	C01A2.1	I	13409933	13411451	-1
WBGene00044197	91.6638	2.24391	0.394825	5.6833	1.32118e-08	1.25203e-06	fbxb-63	V	19302787	19303728	-1
WBGene00021542	213.378	2.23886	0.357029	6.27079	3.5921e-10	4.61794e-08	Y43B11AL.1	IV	7065322	7068035	1
WBGene00015607	96.9298	2.23266	0.379919	5.87667	4.18611e-09	4.31195e-07	fbxb-13	II	1789181	1790217	1
WBGene00018103	132.863	2.21237	0.419464	5.27427	1.33284e-07	1.10519e-05	F36H5.4	II	1761839	1762906	1
WBGene00001828	440.225	2.21216	0.389233	5.68337	1.32064e-08	1.25203e-06	hch-1	X	14696412	14699977	-1
WBGene00000989	418.787	2.20163	0.384683	5.72324	1.04513e-08	1.02559e-06	dhs-26	X	3360722	3362493	-1
WBGene00045300	37.9859	2.19959	0.551029	3.99178	6.55779e-05	0.00264609	fbxc-10	IV	896958	898739	1
WBGene00016309	188.59	2.19106	0.343937	6.37053	1.88378e-10	2.56071e-08	sdz-4	II	958918	960179	1
WBGene00019035	96.6533	2.18831	0.501809	4.36085	1.29561e-05	0.000620992	fbxb-26	II	1682518	1683655	1
WBGene00044109	56.2513	2.18544	0.570561	3.83033	0.000127973	0.00472673	K02E11.10	V	14239942	14241151	-1
WBGene00045299	67.9532	2.18084	0.433666	5.02885	4.93441e-07	3.4971e-05	fbxc-11	IV	901110	902891	1
WBGene00017912	62.9039	2.17775	0.413113	5.27155	1.35274e-07	1.11188e-05	fbxb-107	II	2758625	2761856	1
WBGene00001854	2404.07	2.1719	0.16094	13.4951	1.67051e-41	2.77038e-38	hil-3	X	8159153	8160084	1
WBGene00021773	98.1387	2.17075	0.345093	6.29035	3.16759e-10	4.19875e-08	fbxb-42	II	1537621	1538666	1
WBGene00020833	276.824	2.16499	0.301159	7.18886	6.5334e-13	1.25988e-10	T26C12.3	IV	3269527	3273397	-1
WBGene00013583	113.592	2.16128	0.468298	4.61519	3.92733e-06	0.000221533	ceh-51	V	18874133	18876169	1
WBGene00017251	103.08	2.15733	0.43203	4.99348	5.93017e-07	4.11489e-05	fbxb-105	II	2769670	2770888	-1
WBGene00044567	67.1023	2.15714	0.436445	4.94251	7.71233e-07	5.15731e-05	C46C11.4	X	4644404	4647192	-1
WBGene00013098	44.1707	2.15489	0.523543	4.11598	3.85536e-05	0.00164787	Y51H4A.1	IV	16474044	16477192	-1
WBGene00000449	202.405	2.15229	0.431734	4.98521	6.18938e-07	4.27686e-05	ceh-27	V	11661670	11665085	-1
WBGene00006873	37.9141	2.14902	0.541241	3.97054	7.17107e-05	0.00286566	vab-7	III	10920336	10926041	1
WBGene00000469	277.736	2.1287	0.320876	6.63402	3.26661e-11	5.06294e-09	ces-2	I	14961501	14965361	1
WBGene00007139	1065.86	2.12773	0.181156	11.7453	7.4685e-32	8.84697e-29	mnp-1	III	4356539	4364974	1
WBGene00001105	266.02	2.1166	0.337376	6.27372	3.52516e-10	4.60325e-08	dsl-3	IV	1610236	1612915	1
WBGene00021458	489.803	2.10158	0.181748	11.5632	6.33074e-31	6.17582e-28	Y39G10AL.1	I	2279835	2281516	1
WBGene00013404	48.9432	2.09997	0.56697	3.70384	0.000212359	0.00724642	fbxb-101	I	14088094	14089858	1
WBGene00022334	388.861	2.09795	0.221699	9.46304	2.99106e-21	1.65346e-18	Y82E9BR.1	III	1458536	1466732	1
WBGene00002282	263.252	2.09542	0.380487	5.50721	3.64566e-08	3.33636e-06	let-4	X	14577935	14580921	1
WBGene00021468	4992.83	2.0839	0.193512	10.7688	4.83207e-27	4.00675e-24	epg-2	I	2300086	2302823	1
WBGene00045301	50.1146	2.07959	0.46752	4.44812	8.66241e-06	0.000432703	fbxc-9	IV	892806	894586	1
WBGene00008563	206.25	2.05305	0.4813	4.26564	1.99329e-05	0.000910793	F07H5.13	II	8790558	8791318	1
WBGene00044281	269.194	2.04868	0.280684	7.29891	2.90113e-13	5.66028e-11	R04A9.7	X	391360	394828	-1
WBGene00000439	75.3441	2.04091	0.399453	5.10925	3.23442e-07	2.4493e-05	ceh-16	III	8622658	8626312	1
WBGene00007642	258.343	2.03762	0.322105	6.32595	2.51684e-10	3.39344e-08	C17E4.2	I	9412314	9413222	1
WBGene00021092	75.6778	2.03627	0.479708	4.24481	2.18774e-05	0.000991297	fbxb-34	II	587910	588926	1
WBGene00016549	68.9502	2.01117	0.461371	4.35911	1.30592e-05	0.000624132	C40A11.6	II	2144292	2145666	-1
WBGene00020672	118.109	2.00977	0.490524	4.09718	4.18215e-05	0.00177383	T22B7.3	X	5647378	5650213	1
WBGene00017254	68.2514	2.00184	0.50025	4.00167	6.28964e-05	0.0025503	fbxb-111	II	2773954	2775042	-1
WBGene00017252	74.7182	2.00053	0.509168	3.92902	8.52939e-05	0.00330494	sdz-10	II	2771082	2772266	-1
WBGene00019313	370.131	1.99735	0.243722	8.19519	2.50203e-16	7.68402e-14	btb-10	II	1059664	1060802	-1
WBGene00019705	86.7638	1.99692	0.388214	5.14387	2.69133e-07	2.08565e-05	fbxb-45	II	1042969	1044025	-1
WBGene00000463	646.592	1.97558	0.18135	10.8937	1.23471e-27	1.07771e-24	ceh-43	III	4446637	4449943	-1
WBGene00011432	887.418	1.974	0.339336	5.81725	5.98233e-09	6.08656e-07	sdz-30	I	13307031	13308787	1
WBGene00006545	102.106	1.96182	0.495075	3.96268	7.41118e-05	0.00293334	tbx-8	III	10347575	10349740	1
WBGene00017154	136.841	1.94223	0.408959	4.74921	2.04209e-06	0.000125896	ugt-57	X	6991727	6994162	1
WBGene00004814	1014.68	1.94216	0.251899	7.71009	1.25729e-14	3.02186e-12	skr-8	IV	17165191	17165855	-1
WBGene00018021	142.837	1.9383	0.379717	5.1046	3.31489e-07	2.49565e-05	F34D6.1	II	2679163	2681218	-1
WBGene00004818	579.779	1.93017	0.275669	7.00174	2.52802e-12	4.55702e-10	skr-12	IV	17167253	17168051	1
WBGene00013418	279.739	1.92832	0.337196	5.7187	1.07342e-08	1.04103e-06	Y65A5A.1	IV	16398839	16399875	-1
WBGene00003657	75.8842	1.92791	0.412106	4.6782	2.89409e-06	0.000172027	nhr-67	IV	11169834	11174783	1
WBGene00009861	77.2642	1.92029	0.512244	3.74878	0.000177699	0.0062921	fbxb-8	I	14298755	14299763	1
WBGene00019420	101.985	1.91961	0.390087	4.921	8.61053e-07	5.68912e-05	fbxb-46	II	1570065	1571134	-1
WBGene00016422	2186.06	1.91386	0.305174	6.27137	3.57889e-10	4.61794e-08	noah-1	I	5874422	5878954	-1
WBGene00008138	121.184	1.90569	0.322284	5.91306	3.35805e-09	3.56986e-07	C47D12.4	II	11681825	11682881	1
WBGene00009698	408.174	1.90123	0.265132	7.17089	7.45102e-13	1.42032e-10	F44F1.6	I	13260933	13262727	-1
WBGene00022370	82.7992	1.89725	0.411502	4.61056	4.01587e-06	0.00022424	Y92H12BR.4	I	1427227	1433695	-1
WBGene00000301	8755.07	1.8931	0.121477	15.584	9.34605e-55	3.87487e-51	cav-1	IV	9772510	9773470	1
WBGene00001210	285.111	1.88513	0.518601	3.63503	0.000277945	0.0091276	egl-46	V	6679317	6681573	-1
WBGene00017253	222.555	1.88478	0.441211	4.27183	1.93879e-05	0.000893137	sdz-9	II	2772389	2773634	-1
WBGene00219796	158.708	1.88397	0.304106	6.1951	5.82474e-10	7.20876e-08	C03D6.9	I	9658731	9659037	-1
WBGene00001976	2630.44	1.87695	0.149137	12.5854	2.53968e-36	3.50984e-33	hmg-11	II	4672798	4673746	1
WBGene00012899	205.952	1.87053	0.275682	6.78509	1.16014e-11	1.90493e-09	Y46G5A.7	II	12755170	12756218	-1
WBGene00014173	81.6761	1.87034	0.505093	3.70296	0.000213098	0.00725672	ZK970.7	II	10312293	10312943	1
WBGene00010158	1810.01	1.86512	0.233554	7.98579	1.3962e-15	3.79583e-13	pes-2.2	I	11358167	11359301	-1
WBGene00012323	194.287	1.86299	0.378712	4.91928	8.6861e-07	5.71628e-05	oac-54	II	9158108	9159874	1
WBGene00020674	3259.08	1.86215	0.134587	13.836	1.54557e-43	2.84797e-40	T22B7.7	X	5651869	5653925	-1
WBGene00018456	202.257	1.85781	0.302914	6.13311	8.61784e-10	1.0432e-07	fbxc-39	II	988737	991074	1
WBGene00003977	1812.47	1.84621	0.23181	7.96432	1.66141e-15	4.44401e-13	pes-2.1	I	11355236	11356370	1
WBGene00020361	59.1742	1.84314	0.480194	3.83833	0.000123875	0.00459584	fbxc-19	II	1821026	1823034	1
WBGene00004816	1106.73	1.84312	0.264934	6.95691	3.47809e-12	6.13623e-10	skr-10	IV	15946784	15947438	1
WBGene00001857	52.1949	1.84266	0.493421	3.73446	0.00018812	0.00652716	hil-6	V	2030619	2031475	-1
WBGene00000023	98.8174	1.84179	0.310359	5.9344	2.94917e-09	3.19667e-07	abt-5	I	12011195	12018668	1
WBGene00021919	156.248	1.83058	0.249142	7.34752	2.01912e-13	3.98631e-11	cutl-25	III	3042726	3047125	-1
WBGene00017343	49.9006	1.82915	0.488633	3.74339	0.000181552	0.00640267	F10E7.1	II	7126757	7129015	1
WBGene00021053	131.511	1.82446	0.505367	3.61016	0.000306003	0.00991161	gadr-4	II	4058956	4061698	-1
WBGene00019814	203.101	1.80878	0.381299	4.74373	2.09816e-06	0.000128874	R02C2.1	V	236750	238192	-1
WBGene00235355	77.1528	1.80096	0.488012	3.6904	0.000223898	0.0075933	ZK250.15	II	1946964	1947930	-1
WBGene00017133	276.349	1.7917	0.39245	4.56541	4.9852e-06	0.000271064	EEED8.2	II	5416714	5418377	1
WBGene00003664	147.297	1.77933	0.354471	5.01968	5.17579e-07	3.63709e-05	nhr-74	I	11429029	11432145	1
WBGene00004815	768.81	1.77732	0.236844	7.50418	6.18164e-14	1.28145e-11	skr-9	IV	17163554	17164226	1
WBGene00012239	963.293	1.77066	0.35439	4.99636	5.84235e-07	4.07099e-05	W04A8.4	I	13841895	13843480	-1
WBGene00019700	429.861	1.76673	0.194602	9.0787	1.0988e-19	5.20642e-17	btb-11	II	1023693	1024784	-1
WBGene00009546	114.651	1.76241	0.279477	6.30612	2.8612e-10	3.82663e-08	fbxb-3	IV	11838980	11840423	1
WBGene00020081	205.207	1.75829	0.36743	4.78538	1.70663e-06	0.000106402	sdz-29	II	2123687	2129281	-1
WBGene00019239	58.2049	1.75324	0.476348	3.6806	0.00023269	0.00785932	H24K24.2	V	917817	925945	1
WBGene00011231	280.128	1.74946	0.322785	5.4199	5.96313e-08	5.26024e-06	R11A5.3	I	7862736	7863553	-1
WBGene00004819	734.045	1.74848	0.253639	6.89357	5.44085e-12	9.20726e-10	skr-13	IV	17162024	17162634	-1
WBGene00011752	143.826	1.74743	0.329863	5.29746	1.17427e-07	9.786e-06	fbxa-2	V	16268335	16269567	-1
WBGene00044280	101.321	1.74067	0.345392	5.0397	4.66269e-07	3.34745e-05	W02A2.9	IV	13347665	13348599	1
WBGene00013403	94.464	1.73116	0.430596	4.02038	5.81042e-05	0.00238515	fbxb-100	I	14090738	14096346	-1
WBGene00006547	296.341	1.72783	0.280356	6.163	7.13786e-10	8.76846e-08	tbx-11	III	6045771	6046981	-1
WBGene00021199	66.4309	1.72776	0.449385	3.84471	0.000120694	0.00449795	Y17G9B.2	IV	4764182	4764602	1
WBGene00011977	3709.4	1.72372	0.134417	12.8237	1.2074e-37	1.82032e-34	T24B8.3	II	9059389	9061138	-1
WBGene00009743	270.977	1.71647	0.26403	6.50103	7.97694e-11	1.18116e-08	sptf-1	I	10366621	10371699	1
WBGene00003623	456.422	1.70142	0.3424	4.96912	6.72582e-07	4.59017e-05	nhr-25	X	13008493	13013962	1
WBGene00009212	1538.87	1.69999	0.202158	8.40925	4.12647e-17	1.45603e-14	F28D1.2	IV	12374709	12376121	-1
WBGene00006853	266.779	1.69738	0.224692	7.55427	4.21201e-14	9.07168e-12	unc-130	II	11281986	11283953	1
WBGene00001981	204.561	1.69625	0.351236	4.82938	1.36961e-06	8.68854e-05	hnd-1	X	11684661	11685778	1
WBGene00000478	538.459	1.69519	0.311695	5.43862	5.36957e-08	4.76197e-06	cfz-2	V	3441504	3444877	-1
WBGene00018215	373.206	1.69128	0.467921	3.61447	0.000300967	0.00976759	igcm-1	X	845731	851516	-1
WBGene00017601	182.479	1.69072	0.402292	4.20272	2.63723e-05	0.00117254	ets-7	V	7557541	7558783	-1
WBGene00010808	1322.51	1.69008	0.208754	8.09602	5.67875e-16	1.68172e-13	sepa-1	I	13298209	13300716	-1
WBGene00009361	1035.79	1.67718	0.180864	9.27315	1.80725e-20	9.08226e-18	F33E2.5	I	12591116	12597442	-1
WBGene00019952	105.847	1.67577	0.445079	3.76511	0.000166479	0.00597595	fbxb-74	IV	4437786	4439290	-1
WBGene00021505	162.668	1.67558	0.325995	5.1399	2.74892e-07	2.12037e-05	Y41D4A.3	IV	1753824	1755750	1
WBGene00007182	102.618	1.66094	0.364162	4.561	5.09105e-06	0.000275016	fbxb-119	V	18318595	18319744	1
WBGene00011383	844.199	1.65082	0.391582	4.21576	2.4894e-05	0.00111278	T02E9.5	V	11342233	11344773	1
WBGene00019751	247.426	1.63996	0.313979	5.22315	1.75903e-07	1.42301e-05	M03D4.4	IV	6121773	6127302	-1
WBGene00019278	95.2999	1.63021	0.372876	4.372	1.23113e-05	0.0005918	K01A2.3	II	314125	315786	1
WBGene00016457	4909.79	1.61912	0.165815	9.76466	1.59644e-22	1.01828e-19	C35E7.5	I	10823363	10828454	1
WBGene00001103	166.426	1.60864	0.272424	5.90491	3.52829e-09	3.72696e-07	dsl-1	IV	1207255	1208102	-1
WBGene00008782	248.344	1.60061	0.277049	5.77736	7.5881e-09	7.53539e-07	sdz-14	I	12216249	12217766	-1
WBGene00022741	373.607	1.59886	0.209957	7.6152	2.63279e-14	5.98112e-12	ZK430.5	II	4405864	4416553	1
WBGene00021726	187.301	1.59776	0.321346	4.97209	6.62337e-07	4.55776e-05	bath-10	II	3375079	3376714	1
WBGene00020611	114.664	1.59694	0.438083	3.64528	0.000267098	0.00889469	T20D4.5	V	3413344	3417770	1
WBGene00020613	268.155	1.59231	0.350479	4.54325	5.53936e-06	0.000292526	T20D4.7	V	3408912	3409519	1
WBGene00021774	94.2007	1.58965	0.381458	4.16729	3.0824e-05	0.00134878	fbxb-43	II	1536231	1537275	1
WBGene00016671	210.259	1.57883	0.26249	6.0148	1.80106e-09	2.03189e-07	C45G7.4	IV	2432993	2436472	1
WBGene00007904	858.512	1.57726	0.189859	8.30756	9.7693e-17	3.30144e-14	C33G3.4	X	14071162	14076295	1
WBGene00020261	642.017	1.57488	0.261561	6.02108	1.73256e-09	1.968e-07	vet-1	I	6200798	6202076	-1
WBGene00000928	813.602	1.56047	0.403089	3.87128	0.000108264	0.00407132	dao-2	II	4562853	4563546	1
WBGene00009926	2290.74	1.55421	0.317393	4.89681	9.74067e-07	6.38495e-05	noah-2	IV	14091254	14096617	1
WBGene00004013	857.503	1.54287	0.187157	8.24373	1.6693e-16	5.32378e-14	pha-4	V	20752883	20760317	1
WBGene00019412	108.634	1.53764	0.40718	3.77631	0.000159167	0.00575083	fbxb-49	II	1568520	1569563	1
WBGene00015587	239.777	1.53595	0.391519	3.92304	8.74374e-05	0.00336441	sdz-2	X	17099112	17100752	-1
WBGene00001104	888.382	1.52902	0.172001	8.88962	6.13159e-19	2.82462e-16	dsl-2	IV	1202651	1204970	-1
WBGene00009202	592.872	1.52667	0.233148	6.54805	5.82931e-11	8.86911e-09	aptf-4	II	8590984	8593010	1
WBGene00007321	110.137	1.52633	0.312614	4.88248	1.04757e-06	6.78949e-05	C05B5.4	III	9993885	9996235	1
WBGene00006902	1529.81	1.48388	0.242367	6.12244	9.21543e-10	1.10745e-07	vet-6	I	13269984	13272784	1
WBGene00044303	103.365	1.47972	0.385232	3.8411	0.000122482	0.00455434	hst-3.2	X	2918730	2923984	-1
WBGene00009899	1349.29	1.47668	0.17785	8.30299	1.01528e-16	3.30144e-14	efl-3	II	8412671	8416857	1
WBGene00008784	572.657	1.47643	0.191002	7.72989	1.0764e-14	2.62515e-12	F14B6.3	I	12230418	12232303	1
WBGene00000674	610.491	1.47528	0.189954	7.76651	8.06771e-15	2.05838e-12	col-99	IV	138346	147919	-1
WBGene00020379	4643.8	1.46839	0.24192	6.06973	1.28127e-09	1.51776e-07	T09B4.5	I	6154075	6157438	1
WBGene00010689	107.521	1.46791	0.34903	4.20569	2.60283e-05	0.00116036	K08H2.2	X	13234099	13234957	-1
WBGene00013234	116.864	1.45647	0.36161	4.02775	5.63136e-05	0.00231738	fbxb-24	III	11908968	11909889	1
WBGene00010234	6311.97	1.45521	0.1352	10.7633	5.12783e-27	4.04952e-24	ttr-50	IV	11640047	11641015	-1
WBGene00002827	427.365	1.44995	0.249942	5.80116	6.58592e-09	6.65981e-07	let-653	IV	11885530	11891081	1
WBGene00009088	84.3481	1.43203	0.341316	4.19562	2.7213e-05	0.00120669	F23D12.4	X	14445001	14446165	1
WBGene00045058	331.166	1.42962	0.274135	5.215	1.83816e-07	1.47981e-05	gadr-5	I	13984308	13989588	1
WBGene00002181	892.675	1.42276	0.167465	8.49588	1.96436e-17	7.23931e-15	kal-1	I	14128594	14142207	-1
WBGene00010495	416.985	1.40996	0.265139	5.31781	1.05022e-07	8.84102e-06	K02B12.2	I	8511600	8512505	-1
WBGene00014199	1655.55	1.39594	0.202613	6.8897	5.59106e-12	9.36586e-10	ZK1053.4	I	13241645	13244797	1
WBGene00019843	230.781	1.39168	0.268191	5.18914	2.11272e-07	1.67643e-05	R03E9.2	X	6729997	6733315	-1
WBGene00015055	231.174	1.39085	0.257529	5.40074	6.63665e-08	5.79274e-06	pitr-3	V	9138946	9141397	-1
WBGene00017908	1375.38	1.37878	0.204231	6.75106	1.46768e-11	2.38627e-09	F28H1.1	I	3995709	3996950	1
WBGene00017481	608.47	1.37775	0.215296	6.39934	1.56055e-10	2.15044e-08	F15B10.3	IV	6602680	6603966	1
WBGene00269388	136.299	1.37685	0.301638	4.56457	5.00519e-06	0.000271262	F45C12.17	II	1726141	1727106	1
WBGene00018235	75.7422	1.3729	0.377321	3.63855	0.00027418	0.00905094	F40E12.2	II	3610409	3615352	1
WBGene00014159	281.947	1.37018	0.264313	5.18391	2.17277e-07	1.70774e-05	arrd-4	II	9837089	9838305	-1
WBGene00018204	119.542	1.34986	0.34212	3.94556	7.96133e-05	0.00312869	F39F10.4	X	16902391	16904332	-1
WBGene00004827	645.258	1.34133	0.252458	5.31307	1.07796e-07	9.02874e-06	skr-21	X	13225818	13226678	-1
WBGene00013263	1387.75	1.3316	0.23395	5.69181	1.257e-08	1.20498e-06	Y57A10A.23	II	12240388	12242567	1
WBGene00000453	780.136	1.32569	0.262725	5.0459	4.51385e-07	3.25468e-05	ceh-32	V	11701764	11705400	-1
WBGene00022111	116.209	1.31997	0.307584	4.29143	1.77528e-05	0.000824686	Y71F9AL.6	I	2890446	2891261	1
WBGene00011229	223.049	1.31648	0.326406	4.03325	5.501e-05	0.00227503	R11.4	X	16210303	16210651	-1
WBGene00002248	2333.56	1.31637	0.160453	8.2041	2.32333e-16	7.26982e-14	lam-3	I	10608466	10621433	1
WBGene00006063	1628.55	1.31479	0.156846	8.38268	5.17345e-17	1.78743e-14	sto-1	X	7562831	7564805	1
WBGene00007211	120.424	1.31241	0.317895	4.12845	3.6521e-05	0.00157725	BE10.3	III	12808026	12811650	1
WBGene00000437	526.815	1.30353	0.20212	6.44927	1.12389e-10	1.60678e-08	ceh-13	III	7555617	7558208	1
WBGene00009696	351.82	1.30017	0.194799	6.67444	2.4817e-11	3.91966e-09	F44F1.4	I	13263803	13265570	-1
WBGene00001948	317.41	1.29526	0.214776	6.03076	1.63194e-09	1.86648e-07	hlh-1	II	4518560	4522523	1
WBGene00000425	534.256	1.29346	0.236994	5.45777	4.82146e-08	4.32211e-06	ced-11	III	9119559	9125153	1
WBGene00021293	486.956	1.29342	0.248624	5.20231	1.96825e-07	1.5693e-05	Y25C1A.6	II	3061082	3062112	1
WBGene00004229	134.236	1.28882	0.310814	4.14659	3.37467e-05	0.00147278	ptr-15	V	6966396	6970127	-1
WBGene00016520	786.145	1.28568	0.168987	7.60819	2.77957e-14	6.22924e-12	C39B5.2	III	2233888	2236987	1
WBGene00015112	1082.06	1.2851	0.162656	7.90073	2.77278e-15	7.29902e-13	B0281.5	II	2299854	2300946	-1
WBGene00014144	192.47	1.28362	0.274927	4.66894	3.02758e-06	0.000177418	ZK899.6	X	9463356	9464725	1
WBGene00002233	176.379	1.27238	0.340045	3.74181	0.000182698	0.00641919	kqt-1	X	6619022	6628017	1
WBGene00001249	1069.95	1.27228	0.113009	11.2582	2.10907e-29	1.94315e-26	elt-1	IV	9614970	9620140	1
WBGene00017140	439.611	1.26774	0.215702	5.87728	4.17064e-09	4.31195e-07	EEED8.12	II	5408260	5409024	-1
WBGene00001377	629.187	1.26696	0.188317	6.7278	1.72251e-11	2.77341e-09	eya-1	I	14220783	14231360	-1
WBGene00016295	339.14	1.25745	0.248334	5.06353	4.11555e-07	3.00671e-05	fbxc-40	II	986003	988666	1
WBGene00013699	173.463	1.24867	0.295876	4.22024	2.44039e-05	0.00109382	Y106G6D.2	I	10110982	10111916	1
WBGene00017713	169.15	1.24825	0.267523	4.66594	3.07204e-06	0.000178602	F22E5.20	II	2672632	2673634	-1
WBGene00012240	304.003	1.24406	0.24731	5.03039	4.89479e-07	3.48391e-05	W04A8.5	I	13849599	13850893	-1
WBGene00021299	170.305	1.24142	0.257161	4.82739	1.38334e-06	8.72294e-05	Y27F2A.8	II	3183763	3184630	1
WBGene00007934	1489.72	1.23867	0.130554	9.48778	2.36012e-21	1.34966e-18	C34E7.4	X	12932205	12934978	-1
WBGene00009697	314.358	1.23347	0.276008	4.46898	7.85937e-06	0.00039617	F44F1.5	I	13258381	13260217	-1
WBGene00016274	5643.04	1.22393	0.173752	7.04413	1.8662e-12	3.40099e-10	C30G12.2	II	7290373	7291882	1
WBGene00009297	190.868	1.21921	0.325931	3.74069	0.000183516	0.0064343	sdz-16	V	17326453	17327967	-1
WBGene00018746	273.141	1.20992	0.312079	3.87695	0.000105772	0.00398664	fbxb-103	II	3907140	3908478	1
WBGene00019426	248.719	1.20656	0.30854	3.91056	9.20821e-05	0.00352676	cutl-16	II	6441428	6443921	1
WBGene00017423	2945.74	1.20269	0.118292	10.1671	2.7804e-24	1.92125e-21	F13C5.2	X	593960	596289	1
WBGene00006416	252.472	1.19603	0.275859	4.33567	1.45318e-05	0.000692516	sams-5	IV	6277435	6279572	-1
WBGene00045272	1156	1.1895	0.26946	4.41437	1.01304e-05	0.000500007	F59C12.4	X	16602445	16602717	-1
WBGene00007984	680.127	1.18284	0.129578	9.12842	6.95039e-20	3.39015e-17	irx-1	I	9536465	9540966	-1
WBGene00044068	691.588	1.17992	0.277277	4.25538	2.08693e-05	0.000948211	syd-9	X	7218109	7226825	1
WBGene00003933	544.217	1.17255	0.261802	4.47876	7.5078e-06	0.000379602	pat-9	X	16536837	16540207	1
WBGene00270290	129.395	1.17231	0.310902	3.77067	0.000162809	0.00586963	ZK938.11	II	9839191	9840288	-1
WBGene00016189	420.441	1.15812	0.202073	5.73121	9.97184e-09	9.84363e-07	C28G1.4	X	8849137	8853621	-1
WBGene00000690	191.514	1.15628	0.250869	4.60908	4.04461e-06	0.000225086	col-116	IV	8356776	8357854	1
WBGene00001170	164.455	1.1554	0.291062	3.96961	7.1989e-05	0.00286987	egl-1	V	14431310	14432359	-1
WBGene00016913	7202.74	1.13913	0.162861	6.9945	2.66213e-12	4.74717e-10	lam-2	X	7143918	7151235	-1
WBGene00008341	1110.39	1.13823	0.251254	4.5302	5.89272e-06	0.000307311	ttr-44	V	13529562	13530744	-1
WBGene00020160	3807.72	1.12996	0.150745	7.49587	6.58592e-14	1.34841e-11	igcm-3	X	2698257	2705859	-1
WBGene00011706	613.61	1.12804	0.170192	6.62808	3.40082e-11	5.22215e-09	T11B7.1	IV	8840725	8842805	1
WBGene00010120	186.829	1.12682	0.251121	4.48716	7.21778e-06	0.000367177	dot-1.4	X	11929899	11931646	-1
WBGene00021713	401.983	1.12375	0.238285	4.71599	2.40543e-06	0.000145061	Y49F6A.5	II	3607937	3609862	-1
WBGene00017135	507.193	1.12354	0.240824	4.66541	3.08008e-06	0.000178602	EEED8.4	II	5410467	5411235	1
WBGene00009939	1760.35	1.11848	0.218333	5.12282	3.00996e-07	2.31098e-05	ztf-11	I	9902943	9910545	-1
WBGene00009898	14190.3	1.11604	0.118933	9.38376	6.3664e-21	3.40582e-18	dod-23	II	8398161	8399160	-1
WBGene00014153	237.343	1.11362	0.259386	4.29329	1.76047e-05	0.000820102	vab-23	II	11897365	11901210	-1
WBGene00022129	1026.26	1.10404	0.124669	8.85581	8.30777e-19	3.72368e-16	lron-11	I	2735345	2742508	-1
WBGene00022418	570.173	1.09591	0.21784	5.03079	4.88456e-07	3.48391e-05	igcm-4	X	2039397	2046360	-1
WBGene00008426	821.467	1.08922	0.1279	8.51621	1.64856e-17	6.21357e-15	D2045.9	III	10475245	10479758	1
WBGene00013698	363.468	1.08702	0.212747	5.10944	3.23122e-07	2.4493e-05	Y106G6D.1	I	10107393	10109000	-1
WBGene00012841	155.063	1.08464	0.283913	3.82032	0.000133279	0.00489004	Y43F11A.1	II	12113224	12113848	-1
WBGene00001328	14255	1.07786	0.134958	7.98661	1.38702e-15	3.79583e-13	epi-1	IV	10666827	10679289	1
WBGene00012021	792.849	1.07616	0.181939	5.91494	3.31992e-09	3.5521e-07	T25E12.6	V	16742423	16744881	1
WBGene00045245	532.591	1.07031	0.19268	5.55485	2.77847e-08	2.5742e-06	ttr-34	X	13139847	13140886	1
WBGene00010613	1253.2	1.06145	0.207376	5.11847	3.08022e-07	2.35402e-05	K07A1.6	I	9591939	9593103	-1
WBGene00006870	411.784	1.05989	0.228792	4.63253	3.61223e-06	0.00020657	vab-3	X	10505988	10519563	1
WBGene00019922	417.284	1.05921	0.217563	4.86853	1.12431e-06	7.22694e-05	fbxc-28	II	923821	925192	1
WBGene00021121	177.548	1.05751	0.263391	4.01499	5.94484e-05	0.0024343	W09G12.7	IV	1229080	1230789	1
WBGene00017381	458.294	1.05018	0.251829	4.17022	3.04302e-05	0.00133506	svh-4	X	3315321	3324229	1
WBGene00010288	361.164	1.0464	0.221738	4.71907	2.36924e-06	0.000143925	F58H1.5	V	11958393	11962699	1
WBGene00003779	373.159	1.04142	0.206031	5.05467	4.31134e-07	3.13593e-05	nob-1	III	12077747	12084316	-1
WBGene00013847	4472.28	1.04037	0.231777	4.48866	7.16729e-06	0.00036573	cls-3	III	9186556	9191127	-1
WBGene00008779	569.585	1.03142	0.28035	3.67905	0.000234103	0.00789097	F14B4.1	I	9265951	9270919	-1
WBGene00019407	541.142	1.03072	0.207664	4.96339	6.92729e-07	4.70829e-05	lect-2	II	5790726	5794402	1
WBGene00003976	336.445	1.01515	0.167534	6.05939	1.36638e-09	1.59578e-07	pes-1	IV	5002752	5005418	1
WBGene00001853	8638.97	1.01201	0.157527	6.42435	1.32436e-10	1.86129e-08	hil-2	IV	6294234	6295219	1
WBGene00007331	4437.3	1.00786	0.184312	5.46824	4.54526e-08	4.09666e-06	pho-11	II	9931845	9934443	1
WBGene00006308	220.121	1.00352	0.252279	3.97782	6.95512e-05	0.00278608	sul-1	X	3267294	3270906	-1
WBGene00018485	381.169	1.00238	0.202143	4.9588	7.09315e-07	4.78182e-05	F46C8.3	X	7525571	7527433	1
WBGene00012592	487.706	0.999474	0.215991	4.62739	3.70305e-06	0.000211036	Y38E10A.14	II	12623215	12624506	-1
WBGene00020801	341.612	0.997071	0.201037	4.95964	7.06232e-07	4.78047e-05	T25D10.4	II	6407537	6410281	-1
WBGene00022262	309.773	0.993065	0.242604	4.09336	4.25176e-05	0.00179875	Y73C8C.3	V	3115303	3118128	1
WBGene00018828	221.907	0.991206	0.232372	4.26561	1.9936e-05	0.000910793	sdz-21	III	5654984	5656994	-1
WBGene00004949	668.644	0.987595	0.252814	3.9064	9.3681e-05	0.00357974	sox-2	X	7458293	7463736	-1
WBGene00003001	819.957	0.986128	0.17856	5.52268	3.33861e-08	3.07597e-06	lin-12	III	9060096	9071760	-1
WBGene00013543	540.548	0.960882	0.188288	5.10327	3.3384e-07	2.49565e-05	Y75B8A.6	III	12123881	12130352	-1
WBGene00001430	3437.33	0.956426	0.21069	4.53949	5.63906e-06	0.000295944	fkb-5	I	3898046	3899840	-1
WBGene00012404	236.97	0.952113	0.256459	3.71254	0.00020519	0.00701623	Y6G8.2	V	17594349	17598971	-1
WBGene00007384	741.832	0.94653	0.248185	3.8138	0.000136845	0.00499877	swt-3	IV	10778985	10780711	-1
WBGene00017184	1539.74	0.937425	0.121173	7.73628	1.0237e-14	2.5339e-12	ncam-1	X	692978	703036	1
WBGene00020758	904.169	0.934851	0.177346	5.27134	1.35432e-07	1.11188e-05	T24C4.2	III	867512	869987	-1
WBGene00008565	1510.91	0.929603	0.197984	4.69534	2.66157e-06	0.000159349	acox-1.2	I	12942280	12946562	1
WBGene00018682	1748.41	0.918935	0.141263	6.50512	7.76296e-11	1.15983e-08	aagr-4	X	460651	466912	1
WBGene00020902	1231.03	0.914692	0.129194	7.08002	1.44136e-12	2.65595e-10	jmjc-1	I	3631086	3636485	-1
WBGene00018743	1839.5	0.902219	0.223241	4.04146	5.31191e-05	0.00220232	F53B3.5	X	2872739	2879619	-1
WBGene00194985	209.14	0.90088	0.241301	3.73343	0.000188892	0.00653985	Y25C1A.14	II	3096228	3096957	-1
WBGene00002247	12030.4	0.896955	0.15042	5.96302	2.47613e-09	2.70158e-07	lam-1	IV	5173280	5183708	1
WBGene00013082	1369.34	0.892324	0.217399	4.10454	4.05112e-05	0.00172266	grdn-1	V	18592754	18614101	1
WBGene00003590	935.959	0.890945	0.244347	3.64622	0.000266124	0.00888009	nex-3	III	4442081	4444237	1
WBGene00007372	1600.3	0.888238	0.229811	3.86508	0.000111052	0.00416671	C06B8.7	V	15498743	15511421	1
WBGene00012851	459.524	0.885016	0.235447	3.75887	0.000170684	0.00608735	Y44A6C.2	V	20722234	20723732	1
WBGene00013086	634.558	0.882458	0.20864	4.22956	2.34144e-05	0.00105232	arrd-2	II	9407769	9409017	1
WBGene00000535	5184.76	0.881936	0.213915	4.12284	3.74232e-05	0.00161201	cpi-1	IV	6092603	6093680	-1
WBGene00045077	236.07	0.86456	0.22162	3.9011	9.57572e-05	0.00364229	Y71A12B.18	I	13997363	14007078	1
WBGene00043062	1082.22	0.855229	0.152104	5.62265	1.88048e-08	1.77192e-06	clec-80	IV	2823746	2828069	1
WBGene00021725	578.67	0.84953	0.187954	4.51988	6.1876e-06	0.000317694	bath-9	II	3377111	3378726	1
WBGene00002253	5535.5	0.846315	0.101919	8.30383	1.00805e-16	3.30144e-14	lbp-1	X	3259087	3259855	1
WBGene00000516	576.214	0.842335	0.21281	3.95816	7.55308e-05	0.00297531	cki-1	II	7811240	7812105	1
WBGene00016996	257.362	0.841774	0.231274	3.63973	0.00027292	0.00905094	D1005.2	X	1459047	1462793	1
WBGene00004813	4143.29	0.837994	0.134096	6.24921	4.12542e-10	5.26277e-08	skr-7	V	4422406	4423065	1
WBGene00000120	1996.82	0.837432	0.129561	6.46361	1.02235e-10	1.47431e-08	aly-1	IV	9108931	9109753	1
WBGene00003983	433.706	0.829647	0.218622	3.79489	0.000147711	0.00538383	pes-10	II	12846203	12847836	-1
WBGene00017592	474.244	0.828713	0.211322	3.92156	8.79765e-05	0.00337732	F19C7.2	IV	4599954	4602778	1
WBGene00000882	1983.29	0.817047	0.19499	4.1902	2.78711e-05	0.00122929	cyn-6	III	773403	774159	1
WBGene00004746	2178.97	0.815651	0.221851	3.67658	0.000236385	0.00793566	sdc-2	X	11522707	11533450	1
WBGene00010924	753.217	0.803832	0.151129	5.31885	1.04423e-07	8.83546e-06	M153.1	X	12146832	12148529	1
WBGene00019317	370.753	0.801133	0.207325	3.86415	0.000111477	0.00417322	K02E10.1	X	2496180	2501001	1
WBGene00015569	919.032	0.789541	0.204513	3.8606	0.00011311	0.00422483	C07D10.5	II	7381561	7383499	1
WBGene00004257	485.37	0.786014	0.201747	3.89605	9.77761e-05	0.00371057	pxn-2	X	10972172	10979265	-1
WBGene00004092	348.723	0.783288	0.210333	3.72403	0.000196065	0.00675997	ppt-1	V	6624702	6626344	-1
WBGene00003903	5956.34	0.782982	0.215667	3.63052	0.000282853	0.00923394	pab-2	X	13522264	13527483	-1
WBGene00019918	641.454	0.782546	0.137073	5.70899	1.13649e-08	1.09578e-06	fbxc-36	II	940983	943162	1
WBGene00006844	759.927	0.768112	0.160119	4.79712	1.60963e-06	0.000101114	unc-120	I	8460225	8463015	1
WBGene00020867	871.593	0.765961	0.166081	4.61197	3.98867e-06	0.000224231	shc-2	II	4969186	4988934	1
WBGene00017143	1256.67	0.764192	0.0994129	7.68705	1.50563e-14	3.51681e-12	EEED8.15	II	5419233	5421093	1
WBGene00011486	923.141	0.760259	0.201904	3.76544	0.000166255	0.00597595	T05E12.3	V	17076874	17077989	-1
WBGene00006575	1410.69	0.758869	0.202994	3.73838	0.000185208	0.0064527	tir-1	III	3869591	3901466	-1
WBGene00000857	686.629	0.75184	0.175916	4.27386	1.92113e-05	0.000889947	cwn-1	II	130983	133598	-1
WBGene00015518	1052.58	0.747632	0.164917	4.53338	5.8048e-06	0.000303681	C06E1.1	III	8605832	8606622	1
WBGene00013416	459.041	0.738601	0.201696	3.66195	0.000250299	0.00838577	Y64G10A.7	IV	14291901	14319564	1
WBGene00015779	735.841	0.736326	0.167788	4.38844	1.14164e-05	0.000553596	lrch-1	X	6208761	6213911	-1
WBGene00020891	854.751	0.734814	0.16681	4.40508	1.05744e-05	0.000518834	T28C12.4	V	6316932	6326390	1
WBGene00003172	2306.24	0.732426	0.12375	5.91859	3.24717e-09	3.49682e-07	mec-8	I	9441010	9450731	-1
WBGene00019477	971.882	0.732113	0.177677	4.12046	3.78113e-05	0.00162451	K07C11.4	V	8203379	8205986	1
WBGene00003006	741.951	0.729433	0.132469	5.50645	3.66147e-08	3.33636e-06	lin-17	I	2706883	2717549	1
WBGene00020665	551.083	0.729158	0.188053	3.8774	0.000105579	0.00398664	T22B2.1	X	3926081	3929576	1
WBGene00018878	1857.78	0.729085	0.166018	4.39161	1.12513e-05	0.000547533	glit-1	X	4712279	4715080	1
WBGene00008622	3151.06	0.725775	0.134115	5.4116	6.24631e-08	5.48089e-06	F09C8.2	X	16140507	16147022	-1
WBGene00001169	33069.3	0.717711	0.1612	4.45231	8.49507e-06	0.000425626	eef-1A.2	X	7823652	7825769	1
WBGene00010870	600.042	0.713291	0.14721	4.8454	1.26357e-06	8.09076e-05	let-522	I	7172463	7174156	-1
WBGene00044949	649.526	0.711641	0.151611	4.69385	2.68112e-06	0.000159941	Y49A10A.2	X	10371077	10372664	-1
WBGene00016315	597.816	0.708416	0.132909	5.33008	9.81697e-08	8.38582e-06	C32D5.7	II	6336345	6339557	-1
WBGene00019624	2345.96	0.701595	0.138859	5.05257	4.35906e-07	3.1568e-05	K10C9.3	V	1061595	1067908	1
WBGene00016453	2504.08	0.69207	0.169601	4.08058	4.49243e-05	0.00189092	vet-2	I	10846777	10850103	1
WBGene00013266	1845.73	0.686946	0.113501	6.05236	1.42741e-09	1.65539e-07	Y57A10A.26	II	12264166	12266105	1
WBGene00003772	955.513	0.685621	0.185991	3.68631	0.000227527	0.00770064	nlr-1	IV	12170824	12178335	-1
WBGene00004820	1540.99	0.679963	0.165159	4.11702	3.83799e-05	0.00164468	skr-14	V	4420997	4421596	-1
WBGene00006365	442.507	0.677556	0.187727	3.60926	0.000307068	0.00992674	syg-1	X	2509608	2515317	-1
WBGene00002052	2992.73	0.670818	0.167183	4.01247	6.00869e-05	0.00245439	ifa-4	X	4912308	4915979	-1
WBGene00003243	1939.6	0.655772	0.14436	4.54261	5.55631e-06	0.000292526	mig-10	III	8279108	8305832	1
WBGene00003245	510.171	0.651249	0.150619	4.32382	1.53353e-05	0.000726633	mig-13	X	4796095	4800128	-1
WBGene00002053	9288.94	0.65033	0.158302	4.10815	3.98838e-05	0.00170034	ifb-1	II	5765618	5772084	1
WBGene00016558	1077.46	0.639519	0.154539	4.13824	3.49978e-05	0.00151938	pks-1	X	5413810	5441958	1
WBGene00002497	1248.99	0.63751	0.133464	4.77664	1.78244e-06	0.000110712	let-268	II	10033309	10039980	-1
WBGene00017336	1199.73	0.636487	0.175405	3.62868	0.000284873	0.00928159	ugt-41	V	7161068	7163595	-1
WBGene00013438	1262.56	0.636307	0.15881	4.00672	6.15687e-05	0.00250259	ztf-29	III	11561152	11562655	1
WBGene00011498	832.804	0.632962	0.139302	4.54381	5.52477e-06	0.000292526	T05G5.1	III	9739094	9743339	-1
WBGene00006342	3830.62	0.63254	0.125866	5.02549	5.02142e-07	3.54363e-05	sup-37	V	8786551	8792771	1
WBGene00016539	935.385	0.630756	0.157932	3.99383	6.50135e-05	0.00262972	madd-2	V	1223901	1235445	-1
WBGene00000443	1486.41	0.630248	0.133589	4.71782	2.38386e-06	0.000144284	ceh-20	III	6979884	6981785	1
WBGene00015298	1054.74	0.629015	0.150433	4.18135	2.89784e-05	0.00127474	C01F1.3	II	4295101	4299006	1
WBGene00000792	1249.13	0.627725	0.159357	3.9391	8.1789e-05	0.0031915	crb-1	X	17402540	17414014	-1
WBGene00010519	633.044	0.626861	0.158165	3.96333	7.3912e-05	0.00293243	K03A11.1	X	13051796	13055395	1
WBGene00002124	3243.72	0.625544	0.146462	4.27103	1.94573e-05	0.000893851	inx-2	X	11294962	11296731	-1
WBGene00002989	509.088	0.622265	0.162173	3.83705	0.000124522	0.00460955	lim-7	I	5716574	5725772	1
WBGene00020726	1168.07	0.607383	0.131919	4.60421	4.14038e-06	0.00022888	T23C6.4	X	17147531	17149927	-1
WBGene00011831	2869.43	0.58459	0.123872	4.71932	2.3663e-06	0.000143925	T19B10.2	V	11221302	11222834	1
WBGene00019854	557.286	0.582888	0.148173	3.93382	8.36051e-05	0.00324709	R03H10.1	II	4180271	4183545	1
WBGene00003738	7685.94	0.577405	0.144019	4.00922	6.09204e-05	0.00248232	nid-1	V	12910113	12917198	1
WBGene00002024	4805.06	0.574933	0.134583	4.27194	1.93778e-05	0.000893137	hsp-43	X	6233149	6235541	-1
WBGene00015472	1329.73	0.573524	0.153226	3.74299	0.000181841	0.00640267	C05D9.3	X	1111903	1116794	1
WBGene00006771	12036.7	0.572895	0.126747	4.51999	6.18424e-06	0.000317694	tln-1	I	1721592	1740670	1
WBGene00016871	684.475	0.570473	0.143061	3.98762	6.674e-05	0.00268645	inso-1	X	1300149	1309504	1
WBGene00020911	1630.13	0.563698	0.12372	4.55623	5.20799e-06	0.000279705	cpt-6	V	6490068	6493921	-1
WBGene00002213	1512.3	0.560383	0.119936	4.67234	2.9779e-06	0.000175749	kin-32	I	5086317	5093793	1
WBGene00021146	1280.37	0.558566	0.147791	3.77942	0.000157194	0.00570439	lgc-45	II	3557474	3567490	1
WBGene00009342	25041.7	0.557869	0.142041	3.92751	8.58295e-05	0.00331023	fasn-1	I	8975384	8986534	-1
WBGene00010550	2108.96	0.555701	0.122146	4.54948	5.37774e-06	0.000286767	K04B12.2	II	14434419	14438977	-1
WBGene00000870	1556.09	0.54791	0.132474	4.13598	3.53437e-05	0.00153039	cyd-1	II	12980591	12993118	1
WBGene00019341	4064.94	0.540999	0.0870406	6.21548	5.11681e-10	6.42858e-08	K02F6.7	II	2525220	2529255	-1
WBGene00000482	7634.3	0.540979	0.119545	4.52532	6.03029e-06	0.00031252	chd-3	X	12846437	12852601	-1
WBGene00007836	4300.3	0.536998	0.103647	5.18101	2.20689e-07	1.72637e-05	C31C9.2	II	13636929	13638480	-1
WBGene00004119	1014.5	0.525989	0.133465	3.94103	8.11326e-05	0.00317469	pqn-31	V	9109584	9111013	1
WBGene00013531	882.74	0.508415	0.111121	4.57533	4.75475e-06	0.00026024	Y73F8A.26	IV	15473660	15477512	1
WBGene00000929	4162.68	0.506262	0.139394	3.63189	0.000281358	0.00920324	dao-3	X	8084210	8086550	-1
WBGene00000414	2449.29	0.500533	0.101386	4.9369	7.93758e-07	5.28662e-05	cec-1	III	8426334	8428583	1
WBGene00015547	8151.21	0.499842	0.101454	4.92678	8.3597e-07	5.54549e-05	ain-1	X	16613451	16617675	1
WBGene00006508	3511.16	0.499509	0.137261	3.63912	0.000273576	0.00905094	tns-1	I	5583407	5607529	-1
WBGene00016749	1875.29	0.485917	0.130118	3.73444	0.000188132	0.00652716	C48E7.1	I	6260249	6264540	1
WBGene00014505	3958.03	0.485198	0.12036	4.03122	5.54873e-05	0.00228906	T05E11.9	IV	11106418	11107579	1
WBGene00012943	3896.11	0.483391	0.123072	3.92772	8.57534e-05	0.00331023	bed-2	III	11463665	11470805	-1
WBGene00012317	4331.09	0.482542	0.118164	4.08368	4.43286e-05	0.0018706	ztf-6	I	11206922	11211842	1
WBGene00010066	1411.66	0.472513	0.125751	3.75752	0.000171604	0.00610706	F54F7.6	X	11865383	11866827	1
WBGene00006861	2478.06	0.471876	0.111373	4.23689	2.26636e-05	0.00102412	cal-5	X	5074399	5078120	-1
WBGene00001631	2294.8	0.470196	0.10066	4.67114	2.99535e-06	0.000176152	gly-6	III	4324280	4331227	-1
WBGene00013289	2896.33	0.464149	0.1036	4.48019	7.4578e-06	0.000378227	tag-273	IV	14487086	14505166	-1
WBGene00003111	3173.18	0.46158	0.107154	4.30764	1.65003e-05	0.000770818	mab-20	I	1644588	1651394	-1
WBGene00012980	1565.66	0.455154	0.112019	4.06319	4.84073e-05	0.00202724	efhd-1	II	14178814	14189917	1
WBGene00010964	77825.2	0.439935	0.108695	4.04744	5.17799e-05	0.00215758	ctc-1	MtDNA	7827	9428	1
WBGene00219313	3136.4	0.436875	0.101071	4.32245	1.54309e-05	0.000729078	C17E4.20	I	9414456	9416703	1
WBGene00002232	1972.14	0.424127	0.0908713	4.66734	3.05131e-06	0.00017818	kpc-1	I	11675850	11680975	1
WBGene00001844	2457.76	0.398662	0.0911254	4.37488	1.21502e-05	0.000585751	hid-1	X	2489044	2494339	1
WBGene00001949	3771.99	0.392977	0.0893128	4.40001	1.08245e-05	0.000529539	hlh-2	I	7190834	7193924	-1
WBGene00019604	2424.48	0.39282	0.107407	3.65729	0.000254893	0.00852247	K09H11.7	V	5752463	5753532	-1
WBGene00010962	39689.1	0.392417	0.0966294	4.06105	4.8852e-05	0.00204071	ctc-3	MtDNA	5678	6449	1
WBGene00023209	11576.1	0.363066	0.0787446	4.61068	4.01347e-06	0.00022424	ZC513.7	V	8039469	8040387	-1
WBGene00021808	2039.69	0.358238	0.0968026	3.7007	0.000215002	0.00730654	Y53G8AM.8	III	3267178	3278710	-1
WBGene00006796	3414.24	0.347398	0.0793794	4.37642	1.20645e-05	0.000583315	unc-62	V	4497463	4511449	1
WBGene00013926	3654.52	0.337101	0.0765227	4.40524	1.05666e-05	0.000518834	nep-1	II	11654214	11657172	-1
WBGene00003786	24931.8	0.295401	0.0730064	4.04624	5.20473e-05	0.00216329	npa-1	V	7075877	7081569	1
WBGene00007709	182725	-0.235347	0.0602643	-3.90525	9.41263e-05	0.00358848	clec-87	I	10184478	10185470	-1
WBGene00011292	18590.2	-0.248109	0.0667666	-3.71606	0.000202353	0.0069335	R102.5	IV	10695309	10697071	-1
WBGene00017263	9359.11	-0.25656	0.0705137	-3.63844	0.00027429	0.00905094	F08F3.6	V	5418044	5420067	-1
WBGene00011834	17361.4	-0.260549	0.0629604	-4.1383	3.49882e-05	0.00151938	dvc-1	V	11237438	11239331	-1
WBGene00009186	71178	-0.271026	0.0627496	-4.31917	1.56617e-05	0.00073579	trcs-1	IV	9587100	9588834	-1
WBGene00006541	31529.2	-0.29018	0.0620692	-4.67511	2.93789e-06	0.000174007	tbh-1	X	15500259	15504895	-1
WBGene00007710	16158.9	-0.307723	0.0803991	-3.82744	0.000129483	0.00477189	rsa-1	I	10185780	10187550	1
WBGene00016485	7172.22	-0.315447	0.0867267	-3.63726	0.000275557	0.00906714	meg-4	X	1682954	1686419	1
WBGene00015899	6194.01	-0.315611	0.0812528	-3.88431	0.000102619	0.00388548	C17E7.4	V	3892856	3894573	1
WBGene00002130	12073.3	-0.317561	0.083734	-3.7925	0.000149136	0.00542384	inx-8	IV	11673816	11675635	1
WBGene00008440	10419.4	-0.321548	0.0745654	-4.31229	1.61575e-05	0.000756939	DY3.8	I	8758156	8759032	-1
WBGene00014516	8560.8	-0.331933	0.0712467	-4.65892	3.17876e-06	0.000183682	hpo-42	V	16027501	16029338	-1
WBGene00012879	26473.8	-0.340167	0.0811588	-4.19138	2.77265e-05	0.00122618	fbxa-215	IV	13665345	13666909	-1
WBGene00019820	12445.9	-0.359647	0.0794475	-4.52685	5.98702e-06	0.00031125	cogc-8	IV	240451	244129	1
WBGene00021818	1800.13	-0.425431	0.111462	-3.81682	0.000135183	0.00494894	Y53G8B.2	III	3101267	3103955	-1
WBGene00002271	11303.5	-0.485471	0.104355	-4.65213	3.2852e-06	0.000189173	lec-8	X	9850209	9851375	1
WBGene00003096	18043.2	-0.487454	0.130349	-3.73961	0.000184303	0.00643469	lys-7	V	3481421	3482600	-1
WBGene00001055	2148.88	-0.500745	0.109257	-4.58319	4.57946e-06	0.000252311	dpf-2	X	14831824	14838241	1
WBGene00013297	16575.8	-0.5027	0.11346	-4.43064	9.39518e-06	0.000467897	Y57G11B.5	IV	14574819	14576580	1
WBGene00007599	890.914	-0.504876	0.135599	-3.72329	0.000196641	0.00676575	C15A11.7	I	7404950	7408511	1
WBGene00010204	130721	-0.507977	0.110045	-4.6161	3.91012e-06	0.000221316	F57F5.1	V	12003028	12004600	1
WBGene00019738	1555.06	-0.593631	0.131311	-4.5208	6.16069e-06	0.000317694	clec-265	X	3031723	3033203	1
WBGene00008944	1774.62	-0.618923	0.166127	-3.72561	0.000194845	0.0067319	F19B2.5	V	20162649	20164561	-1
WBGene00008132	12408.2	-0.655074	0.112978	-5.79825	6.70098e-09	6.7351e-07	gale-1	I	12975183	12978749	1
WBGene00016084	26983.1	-0.66803	0.130906	-5.10313	3.34078e-07	2.49565e-05	cht-3	IV	7003623	7009268	1
WBGene00044001	2686.88	-0.701569	0.137939	-5.08609	3.65528e-07	2.69419e-05	C09G4.4	IV	8513205	8513916	1
WBGene00010209	436.571	-0.799938	0.182157	-4.39148	1.12584e-05	0.000547533	fbxa-191	V	17637982	17640042	-1
WBGene00010212	1256.21	-0.845309	0.17488	-4.83365	1.34052e-06	8.55043e-05	fbxa-192	V	17640672	17650527	-1
WBGene00019779	7465.69	-0.928825	0.234584	-3.95946	7.51206e-05	0.00296619	endu-2	X	8242056	8247869	1
WBGene00023069	577.663	-0.996575	0.201249	-4.95196	7.34682e-07	4.93278e-05	rncs-1	X	1011501	1012347	1
WBGene00019105	1375.84	-1.02932	0.230639	-4.46289	8.08626e-06	0.000406371	asp-8	V	3024520	3027931	1
WBGene00017294	431.708	-1.07534	0.22569	-4.76467	1.89161e-06	0.000117054	F09E10.1	X	1502860	1503278	1
WBGene00044644	1437.31	-1.16145	0.309157	-3.75682	0.000172085	0.00611103	B0205.13	I	10727755	10728808	-1
WBGene00018908	2516.67	-1.2266	0.189756	-6.46411	1.01899e-10	1.47431e-08	fncm-1	I	5190142	5195243	1
WBGene00000708	4941.34	-1.3396	0.255968	-5.23349	1.66343e-07	1.35893e-05	col-135	IV	15129666	15131797	-1
WBGene00009221	4645.91	-1.40766	0.183714	-7.66221	1.82758e-14	4.20952e-12	acs-2	V	15567394	15569889	1
WBGene00022083	319.487	-1.45043	0.296845	-4.88615	1.02828e-06	6.71379e-05	Y69A2AR.12	IV	2568614	2572056	1
WBGene00003099	310.625	-1.45372	0.343349	-4.23394	2.29631e-05	0.00103484	lys-10	IV	8332826	8333559	1
WBGene00009035	99834.6	-1.7175	0.114099	-15.0527	3.31467e-51	9.16174e-48	gfat-2	IV	11410228	11413001	1
WBGene00018225	186.799	-1.9543	0.337286	-5.79419	6.86521e-09	6.85859e-07	nep-14	X	8375288	8377304	1
WBGene00023489	488.481	-1.96003	0.244258	-8.02442	1.02005e-15	2.91663e-13	F42A10.9	III	6164645	6171165	1
WBGene00014672	173.304	-2.89477	0.370219	-7.81906	5.32191e-15	1.37904e-12	C08F11.6	IV	13636560	13636975	-1
WBGene00007454	604.913	-4.29722	0.412494	-10.4177	2.05973e-25	1.48516e-22	C08F11.7	IV	13637288	13638525	1
WBGene00005832	34.5016	-5.39797	1.05907	-5.09689	3.45283e-07	2.56779e-05	srw-85	V	19429440	19431687	-1
WBGene00021719	23.9672	-8.12464	1.52453	-5.32928	9.86032e-08	8.38582e-06	fbxb-104	II	3475644	3477271	-1
